# Supplementary material for: Recommendations for the Design and Implementation of Virtual Reality for Acquired Brain Injury Rehabilitation: Systematic Review
Source: PubMed Central journal article supplement (PMC8367177; doi:10.2196/26344), 2021-07-30
Supplement: jmir_v23i7e26344_app1.pdf [file jmir_v23i7e26344_app1.pdf]

## Example database searches

### Medline search for Part 1

| <i>Step</i> | <i>Key word</i>                                                                                                                        |
|-------------|----------------------------------------------------------------------------------------------------------------------------------------|
| 1           | exp Virtual Reality/                                                                                                                   |
| 2           | virtual reality.tw.                                                                                                                    |
| 3           | 1 or 2                                                                                                                                 |
| 4           | exp Guideline/                                                                                                                         |
| 5           | (guideline* or practice guideline* or framework).tw.                                                                                   |
| 6           | 4 or 5                                                                                                                                 |
| 7           | exp Clinical Trial/                                                                                                                    |
| 8           | (assess* or evaluati* or diagnos* or intervention* or therapy or treat* or trial* or clinical practice).tw.                            |
| 9           | 7 or 8                                                                                                                                 |
| 10          | exp Rehabilitation/ or exp brain injuries/ or exp Head Injuries, Closed/                                                               |
| 11          | (rehabilitation or neurorehabilitation or neurolog* or traumatic brain injur* or brain injur* or TBI or ABI or closed-head injur*).tw. |
| 12          | 10 or 11                                                                                                                               |
| 13          | 3 and 6 and 9 and 12                                                                                                                   |
| 14          | limit 13 to english language                                                                                                           |
| 15          | limit 14 to yr="2009 -Current"                                                                                                         |

### Medline search for Part 2

| <i>Step</i> | <i>Key word</i>                                                                                         |
|-------------|---------------------------------------------------------------------------------------------------------|
| 1           | exp virtual reality/                                                                                    |
| 2           | virtual reality.tw.                                                                                     |
| 3           | 1 or 2                                                                                                  |
| 4           | exp brain injuries/                                                                                     |
| 5           | exp Head Injuries, Closed/                                                                              |
| 6           | (traumatic brain injur* or TBI or brain injur* or closed head injur*).tw.                               |
| 7           | 4 or 5 or 6                                                                                             |
| 8           | (assess* or evaluat* or diagnos* or intervention* or rehabilitation or therapy or treat* or trial*).tw. |
| 9           | 3 and 7 and 8                                                                                           |
| 10          | limit 9 to english language                                                                             |
| 11          | limit 10 to yr="2009 -Current"                                                                          |
