# Supplementary material for: Recommendations for the Design and Implementation of Virtual Reality for Acquired Brain Injury Rehabilitation: Systematic Review
Source: PubMed Central journal article supplement (PMC8367177; doi:10.2196/26344), 2021-07-30
Supplement: jmir_v23i7e26344_app2.pdf [file jmir_v23i7e26344_app2.pdf]

## Recommendations for the Design and Implementation of Virtual Reality for Acquired Brain Injury Rehabilitation

### 1. End user involvement

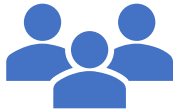

- 1.1 Involve end users during VR development and implementation [39,40,66,67,95,98]:
  - 1.1.1 Conduct iterative testing with VR prototypes and gather positive/negative feedback from intended end users.
  - 1.1.2 Conduct observations, questionnaires, interviews, or focus groups to establish end user opinions, needs, challenges, and expectations (eg, technology experience, co-morbidities) [66].
  - 1.1.3 Document all feedback from end users [66].

### 2. Participant factors

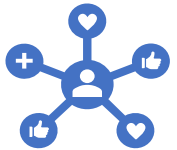

- 2.1 Define end users and how they will experience VR in the context of their condition(s) [66].
- 2.2 Consider a range of participant factors when designing VR tasks (eg, gender, age, health conditions, cognitive/physical/communication impairments) [40,66,95-98].
- 2.3 Observe intended users in a clinically relevant or specific context to learn about their behavior(s) [66].
- 2.4 Examine the impact of VR on patient motivation and engagement in rehabilitation [10,66,98].

### 3. Adverse effects and safety

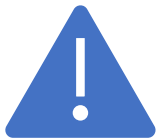

- 3.1 Measure and describe patient-reported adverse effects associated with VR tasks and equipment. This should be documented for healthy users and the intended patient population(s) [40,66].
- 3.2 Examine the safety of VR devices and tasks to determine suitability/contraindications for a given population [39,41,98].

### 4. Researcher involvement

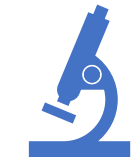

- 4.1 Develop ideas for testing as a team [66].
- 4.2 Evaluate and develop prototypes for end user testing based on ideas that are feasible (eg, within financial limitations) [66].

### 5. Determining barriers and facilitators to VR

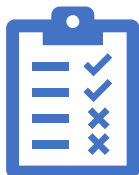

- 5.1 Identify potential barriers and facilitators to designing and implementing VR with key stakeholders [35,39,66,67]:
  - 5.1.1 Include patient, therapist, administrator, technical, site-specific, and operational facilitators and barriers to use.
  - 5.1.2 Consider facilitators and barriers to location, personnel for support, costs, client motivation, and therapist experience.
- 5.2 Identify causes of barriers and offer solutions or implementation strategies [35,66].

## 6. Rehabilitation principles

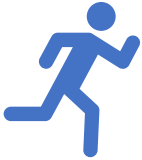

- 6.1 Maintain therapeutic principles in VR task designs (eg, principles of motor learning) [94,95].
- 6.2 Provide tasks that can be gradually modified to progressively challenge physical and/or cognitive ability in line with abilities of end users (consider condition severity and stage of recovery) [94-98].
- 6.3 Feedback:
  - 6.3.1 Provide feedback of performance in real-time to sustain engagement and motivation [94-96].
  - 6.3.2 Provision of knowledge of performance/results should not interfere with task performance [94-96].
  - 6.3.3 Consider providing multimodal feedback (eg, visual, auditory, haptic) [94,96,97].
  - 6.3.4 Feedback modality should consider cognitive level/performance [94-97].

## 7. Technological design and development

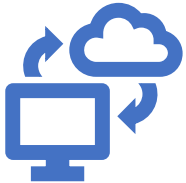

- 7.1 Use 'technically sound' and 'flexible' hardware and software [95]:
  - 7.1.1 Avoid complex or restrictive interfaces.
  - 7.1.2 Ensure that hardware allows for adequate movement and considers postural constraints.
- 7.2 Work in collaboration with VR experts, game developers and/or engineers [35,39,40].

## 8. Supporting implementation

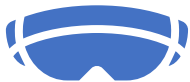

- 8.1 Support therapists with VR adoption:
  - 8.1.1 Facilitate time for learning (consider train-the-trainer or mentoring models) [35,39,67].
  - 8.1.2 Identify ways to support engagement, training, and troubleshooting [67,93,99].
  - 8.1.3 Provide clear information about ways to use VR for rehabilitation and how to maximize user engagement [35,39,67,98,99].
  - 8.1.4 Ensure access to technical supports and systems (eg, adequate internet access, troubleshooting) [39,99].
- 8.2 Provide education and continued training for therapists and students [35,39,93]:
  - 8.2.1 Include tailored clinical training packages and tools based on best practices and therapist needs.
- 8.3 Provide information, training, and support for patients using VR in terms of familiarization, purposes of using VR, adequate instructions, and monitoring of performance (either in the clinic or remotely) [95,96,98,99].

## 9. Research study design, reporting, and analysis

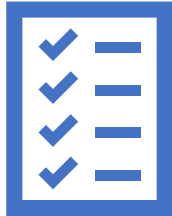

### 9.1 RCTs:

- 9.1.1 Conduct large, adequately powered trials [10].
- 9.1.2 Use appropriate methods for randomization (eg, computer generation) [66].
- 9.1.3 Ensure that allocation is concealed [66].
- 9.1.4 Select and justify control condition(s) [10,66].
- 9.1.5 Control interventions should be described and standardized [93].

### 9.2 Reporting:

- 9.2.1 Describe intervention details (eg, dose, frequency, repetitions, intensity, equipment) [41,66] and consider using guidelines for reporting of interventions (eg, TIDIER, CONSORT) [66].
- 9.2.2 Report on methods of concealment and blinding [66].
- 9.2.3 Provide information about the number of participants screened against eligibility criteria to provide information about who may be suitable to use VR [10, 66].
- 9.2.4 Register trials and publish all research regardless of the outcome(s) [66].

### 9.3 Analysis [66]:

- 9.3.1 Employ intention-to-treat analysis for primary outcome measures.
- 9.3.2 If relevant, report on per-protocol analysis.
- 9.3.3 Aim for a minimum of 10 observations for each independent variable in multivariable analyses.

### 9.4 Outcome Measures:

- 9.4.1 Outcomes should be clinically relevant [41,66], validated [66], and common to increase usefulness of meta-analysis [10, 93].
- 9.4.2 Consider using patient-reported outcome measures [41,66].
- 9.4.3 Outcome measures should be taken pre- and post-VR intervention [10,66].
- 9.4.4 Modify or revalidate psychometric properties if needed (in the context of immersive VR) [41,66].
- 9.4.5 Measure the long-term effects of VR interventions (ie, at least three months postintervention) [10,66].
- 9.4.6 If possible, use control groups for comparison of outcomes [66].
- 9.4.7 Future research on participation outcomes should evaluate VR practice within natural environments [93].
